# Supplementary material for: Physicochemical characterization of particulate matter in a cement production plant
Source: Royal Society of Chemistry journal article supplement (doi:10.1039/d2em00139j), 2022-01-01
Supplement: d2em00139j1.pdf [file d2em00139j1.pdf]

## Electronic Supplementary Information

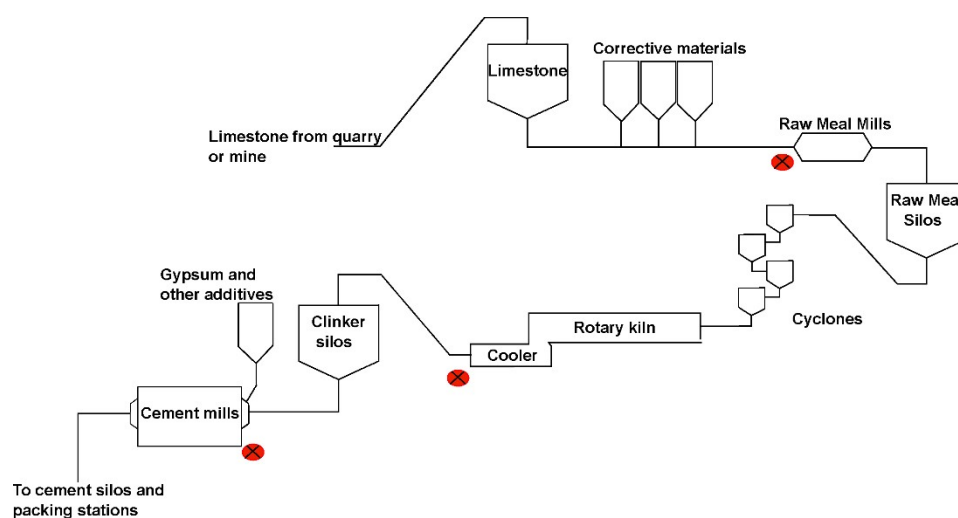

**Figure S1:** Main processes in the cement production and location of sampling equipment (red dots).

**Table S1:** Overview of samples collected during the two sampling campaigns.

| <b>Location</b>                                  | <b>Campaign 1, Spring 2017<br/>(30.05.2017-01.06.2017)</b>                                                                                                                                                                                                                   | <b>Campaign 2, Fall 2018<br/>(14.11.2018-16.11.2018)</b>                                                                                                                                                          |
|--------------------------------------------------|------------------------------------------------------------------------------------------------------------------------------------------------------------------------------------------------------------------------------------------------------------------------------|-------------------------------------------------------------------------------------------------------------------------------------------------------------------------------------------------------------------|
| Raw meal mill                                    | <p><b>NanoMOUDI PVC substrates</b> (Mass - Gravimetric and elemental analysis - <b>contaminated</b>)</p> <p><b>NanoMOUDI, TEM grids</b><br/>(SEM on all impactor stages)</p>                                                                                                 | <p><b>SMPS (model 3938)</b><br/>Number -size distribution<br/>(17-542 nm <math>d_{me}</math>)</p> <p><b>APS (model 3321)</b><br/>Number -size distribution<br/>(0.542-17.15 <math>\mu\text{m } d_{ae}</math>)</p> |
| Clinker conveyor belt                            | <p><b>NanoMOUDI, PVC substrates</b><br/>(Mass - Gravimetric and elemental analysis)</p> <p><b>NanoMOUDI, TEM grids</b><br/>(SEM on all impactor stages, TEM on stage 6)</p>                                                                                                  | <p><b>SMPS (model 3938)</b><br/>Number -size distribution<br/>(17-542 nm <math>d_{me}</math>)</p> <p><b>APS (model 3321)</b><br/>Number -size distribution<br/>(0.542-17.15 <math>\mu\text{m } d_{ae}</math>)</p> |
| Cement mill                                      | <p><b>NanoMOUDI, PVC substrates</b><br/>(Mass-Gravimetric and elemental analysis)</p> <p><b>NanoMOUDI, TEM grids</b><br/>(SEM on all impactor stages)</p>                                                                                                                    | <p><b>SMPS (model 3938)</b><br/>Number -size distribution<br/>(17-542 nm <math>d_{me}</math>)</p> <p><b>APS (model 3321)</b><br/>Number -size distribution<br/>(0.542-17.15 <math>\mu\text{m } d_{ae}</math>)</p> |
| Personal air sampling<br>(not specific location) | <p><b>Personal Sioutas impactors, Teflon filters</b><br/>(Mass - Gravimetric analysis)</p> <p><b>Personal respirable cyclones, PVC filters</b><br/>(Mass - Gravimetric analysis)</p> <p><b>Personal thoracic cyclones, PVC filters</b><br/>(Mass - Gravimetric analysis)</p> |                                                                                                                                                                                                                   |

**Table S2: Recoveries of Portland Cement**

| <b>Oxide</b>                   | <b>Recovery (%)</b> |
|--------------------------------|---------------------|
| Na <sub>2</sub> O              | 87                  |
| MgO                            | 100                 |
| Al <sub>2</sub> O <sub>3</sub> | 100                 |
| SiO <sub>2</sub>               | 113                 |
| P <sub>2</sub> O <sub>5</sub>  | 86                  |
| SO <sub>3</sub>                | 77                  |
| K <sub>2</sub> O               | 86                  |
| CaO                            | 102                 |
| TiO <sub>2</sub>               | 102                 |
| Cr <sub>2</sub> O <sub>3</sub> | 72                  |
| Mn <sub>2</sub> O <sub>3</sub> | 83                  |
| Fe <sub>2</sub> O <sub>3</sub> | 82                  |
| ZnO                            | 85                  |

**Table S3: Calculated thoracic and respirable fractions from the Sioutas impactor**

| <b>Thoracic cyclone (mg/m<sup>3</sup>)</b> | <b>Calculated thoracic (mg/m<sup>3</sup>)</b> | <b>Respirable cyclone (mg/m<sup>3</sup>)</b> | <b>Calculated respirable (mg/m<sup>3</sup>)</b> |
|--------------------------------------------|-----------------------------------------------|----------------------------------------------|-------------------------------------------------|
| 0.37                                       | 0.25                                          | 0.14                                         | 0.25                                            |
| 9.5                                        | 24                                            | 10                                           | 16                                              |
| 2.5                                        | 1.1                                           | 0.60                                         | 5.5                                             |
| 0.89                                       | 0.83                                          | 0.28                                         | 0.47                                            |
| 0.53                                       | 0.48                                          | 0.23                                         | 0.44                                            |
| 4.5                                        | 5.1                                           | 1.8                                          | 2.6                                             |
| 3.3                                        | 14                                            | -                                            | 8.4                                             |
| 1.8                                        | 0.46                                          | 0.50                                         | 0.29                                            |
| 1.8                                        | 4.4                                           | 1.0                                          | 2.6                                             |
| 4.5                                        | 5.9                                           | 1.7                                          | 3.4                                             |
